# Supplementary material for: Anti-Inflammatory Effect of an Apigenin-Maillard Reaction Product in Macrophages and Macrophage-Endothelial Cocultures
Source: PubMed Central journal article supplement (PMC6541947; doi:10.1155/2019/9026456), 2019-05-16
Supplement: 9026456.f1.pdf [file 9026456.f1.pdf]

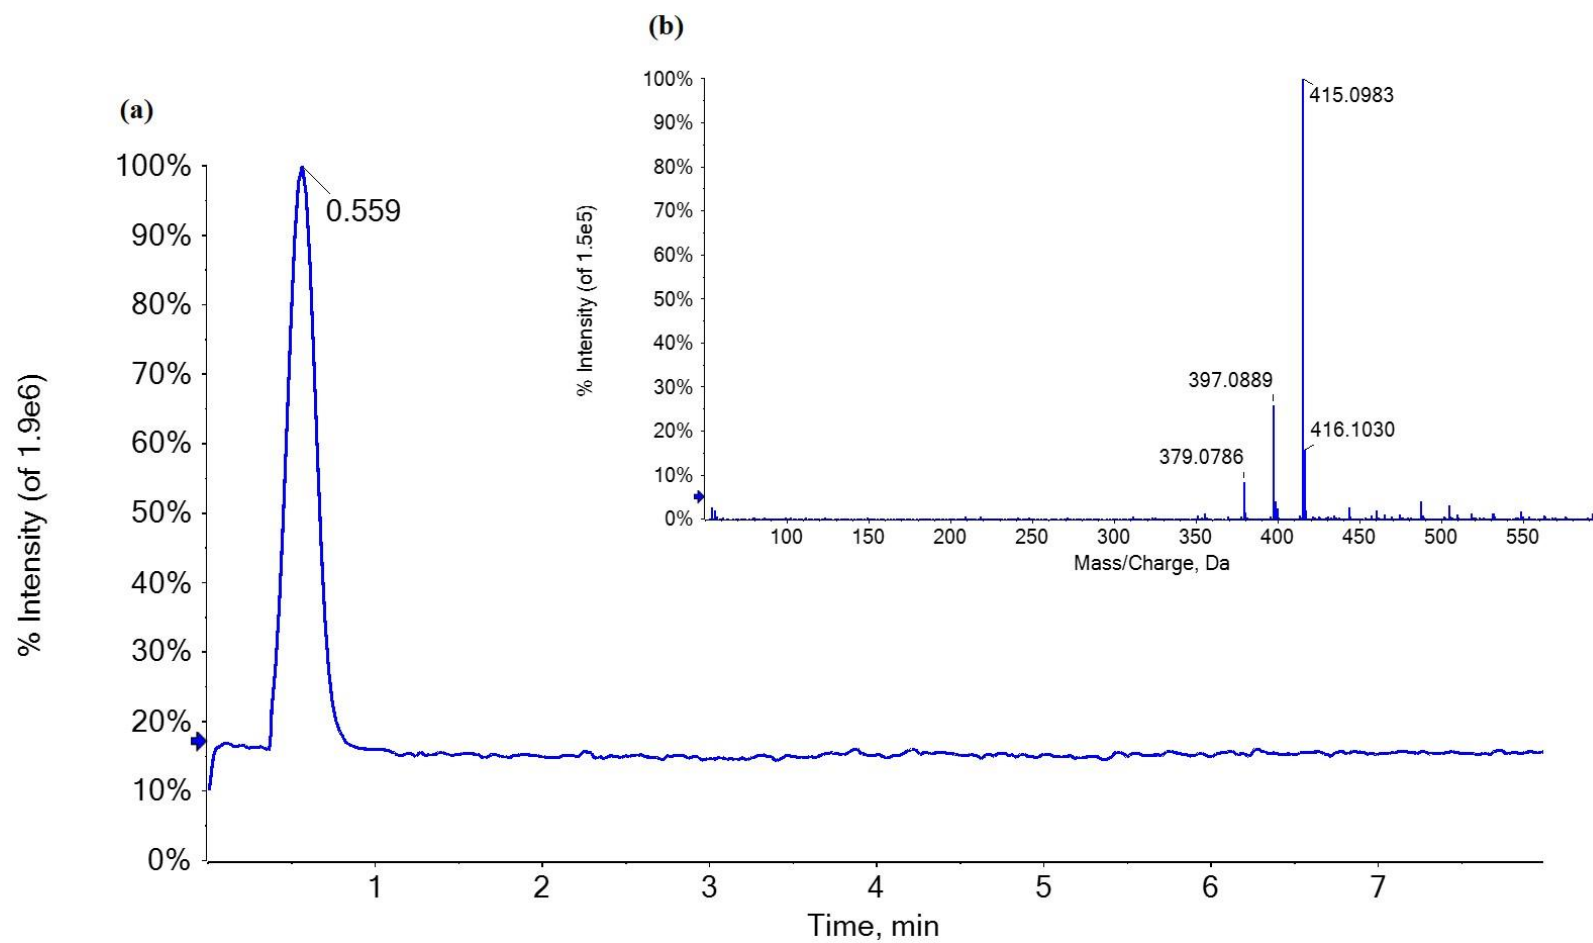

1

2 Figure 1: The total ion chromatogram (TIC) and extracted ion chromatogram (XIC) of DMA detected by HPLC-Q-ToF-MS. (a) TIC. (b) XIC. Positive mode was adopted,  
 3 collision energy=10 V, ionspray voltage at 5500 V, ion scan from 50-600 Da, temperature at 400 °C.  $[M+H]^+$  at m/z 415.0983, m/z 397.0889 means a molecule depletion of  
 4  $H_2O$ , m/z 379.0786 means two molecule depletion of  $H_2O$ .

5

6

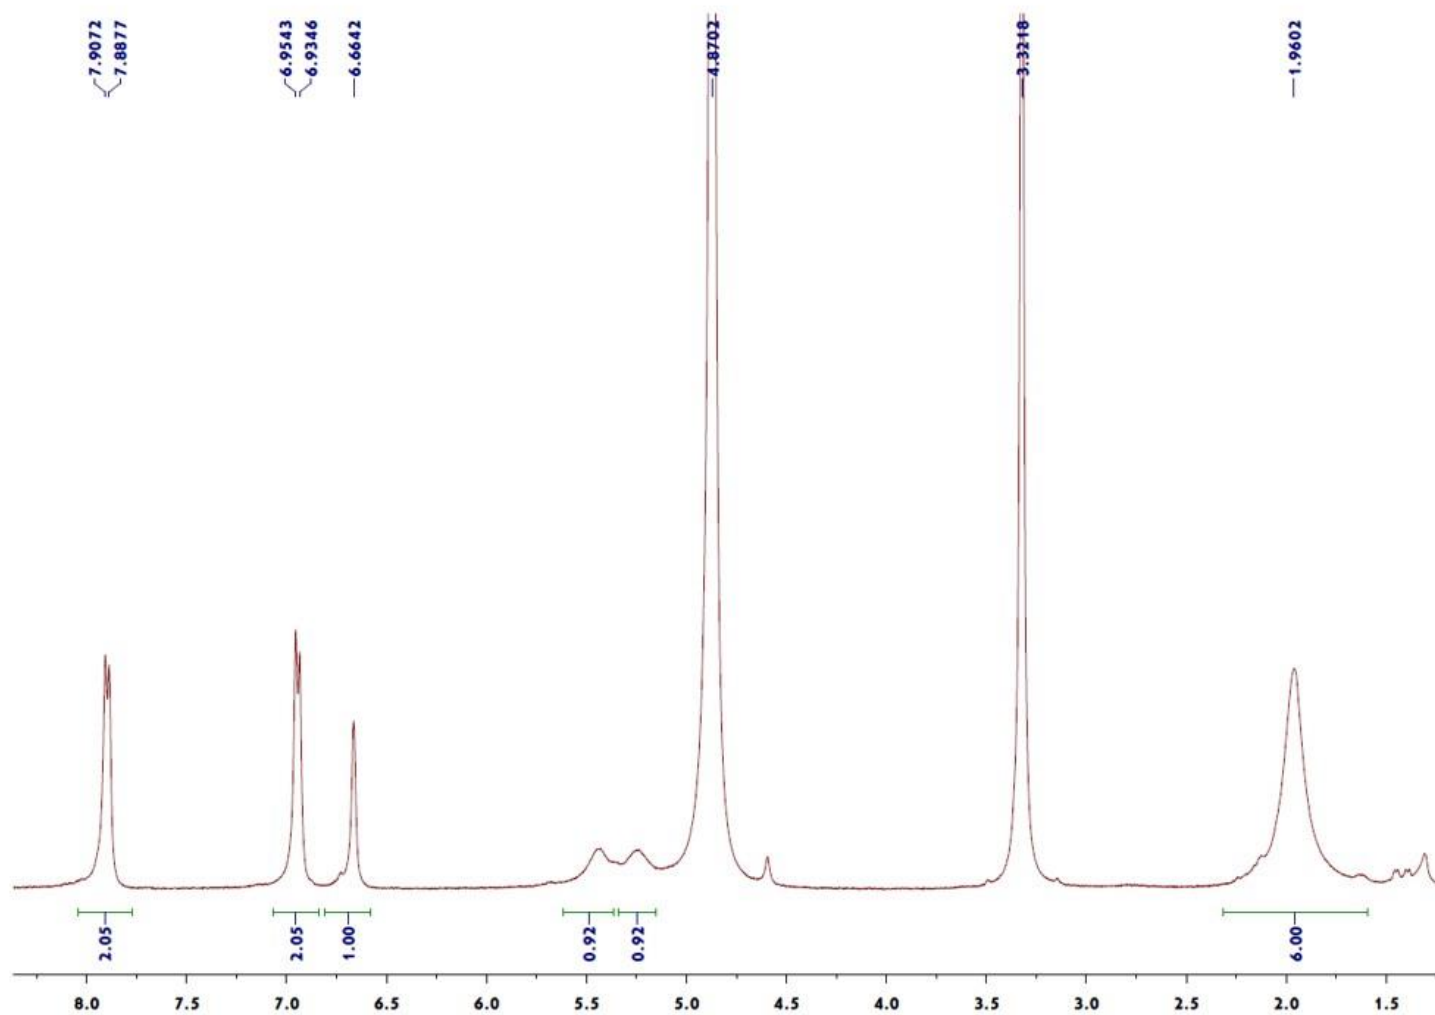

7

8 Figure 2: <sup>1</sup>H NMR of DMA. A 400 MHz Bruker instrument (Billerica, MA, USA) was adopted at 25 °C, with compound dissolved in CD<sub>3</sub>OD in a 3 mm i.d. tube. The  
9 chemical shift assignments were referenced internally to TMS at 0 ppm.
